# Supplementary material for: Effects of Cantharidin on Fish Erythrocytes, Tumor Cell Lines, and Marine Pathogenic Bacteria
Source: MDPI journal article supplement (doi:10.3390/fishes8050270), 2023-05-19
Supplement: s1 [file s1]

## Effects of Cantharidin on Fish Erythrocytes, Tumor Cell Lines, and Marine Pathogenic Bacteria

Jose Carlos Campos-Sánchez, Francisco A. Guardiola and María Ángeles Esteban \*

Immunobiology for Aquaculture Group, Department of Cell Biology and Histology, Faculty of Biology, Campus Regional de Excelencia Internacional "Campus Mare Nostrum", University of Murcia, 30100 Murcia, Spain; josecarlos.campos@um.es (J.C.C.-S.); faguardiola@um.es (F.A.G.)

\* Correspondence: aesteban@um.es

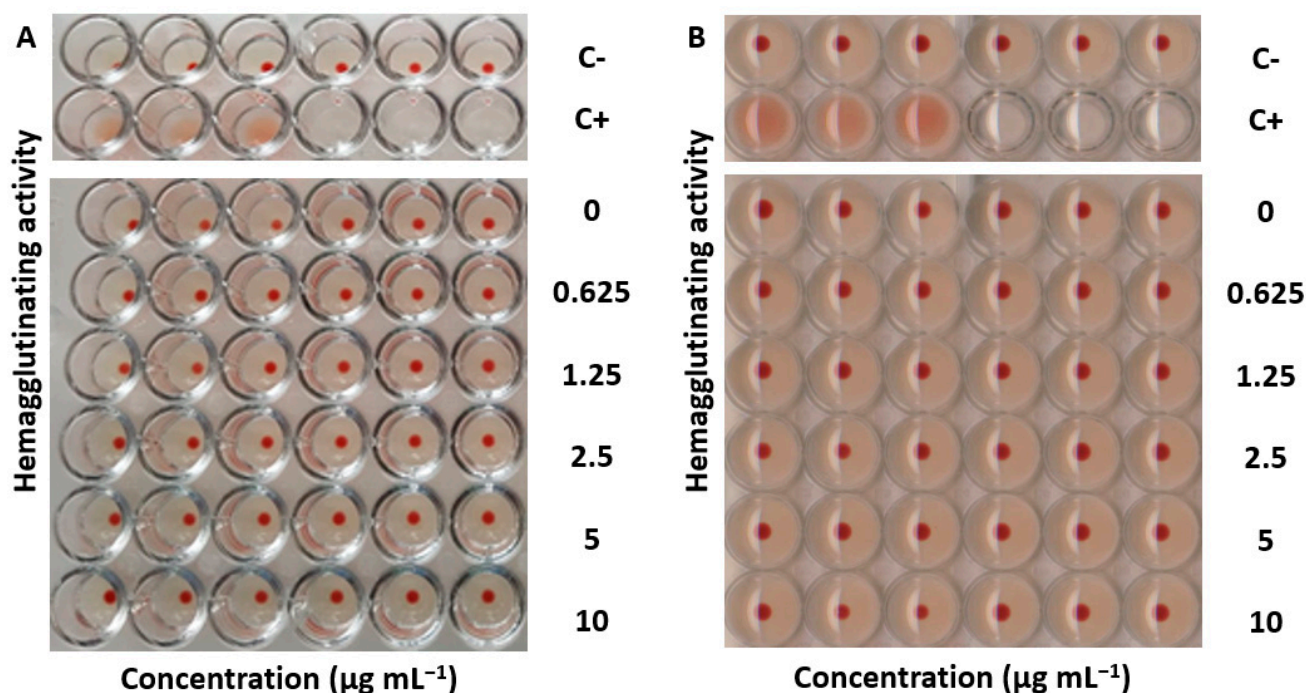

**Figure S1.** Hemagglutination activity of gilthead seabream erythrocytes exposed to different concentrations of cantharidin (0, 0.625, 1.25, 2.5, 5, and 10  $\mu\text{g mL}^{-1}$ ) for 1.5 h. Macroscopic image of the incubation plate: (A) top view and (B) bottom view. PBS (0.35 % sodium chloride, 10 mM glucose) and Concanavalin A were used as a negative and as positive controls (C- and C+), respectively. The results are representative of at least three independent experiments.

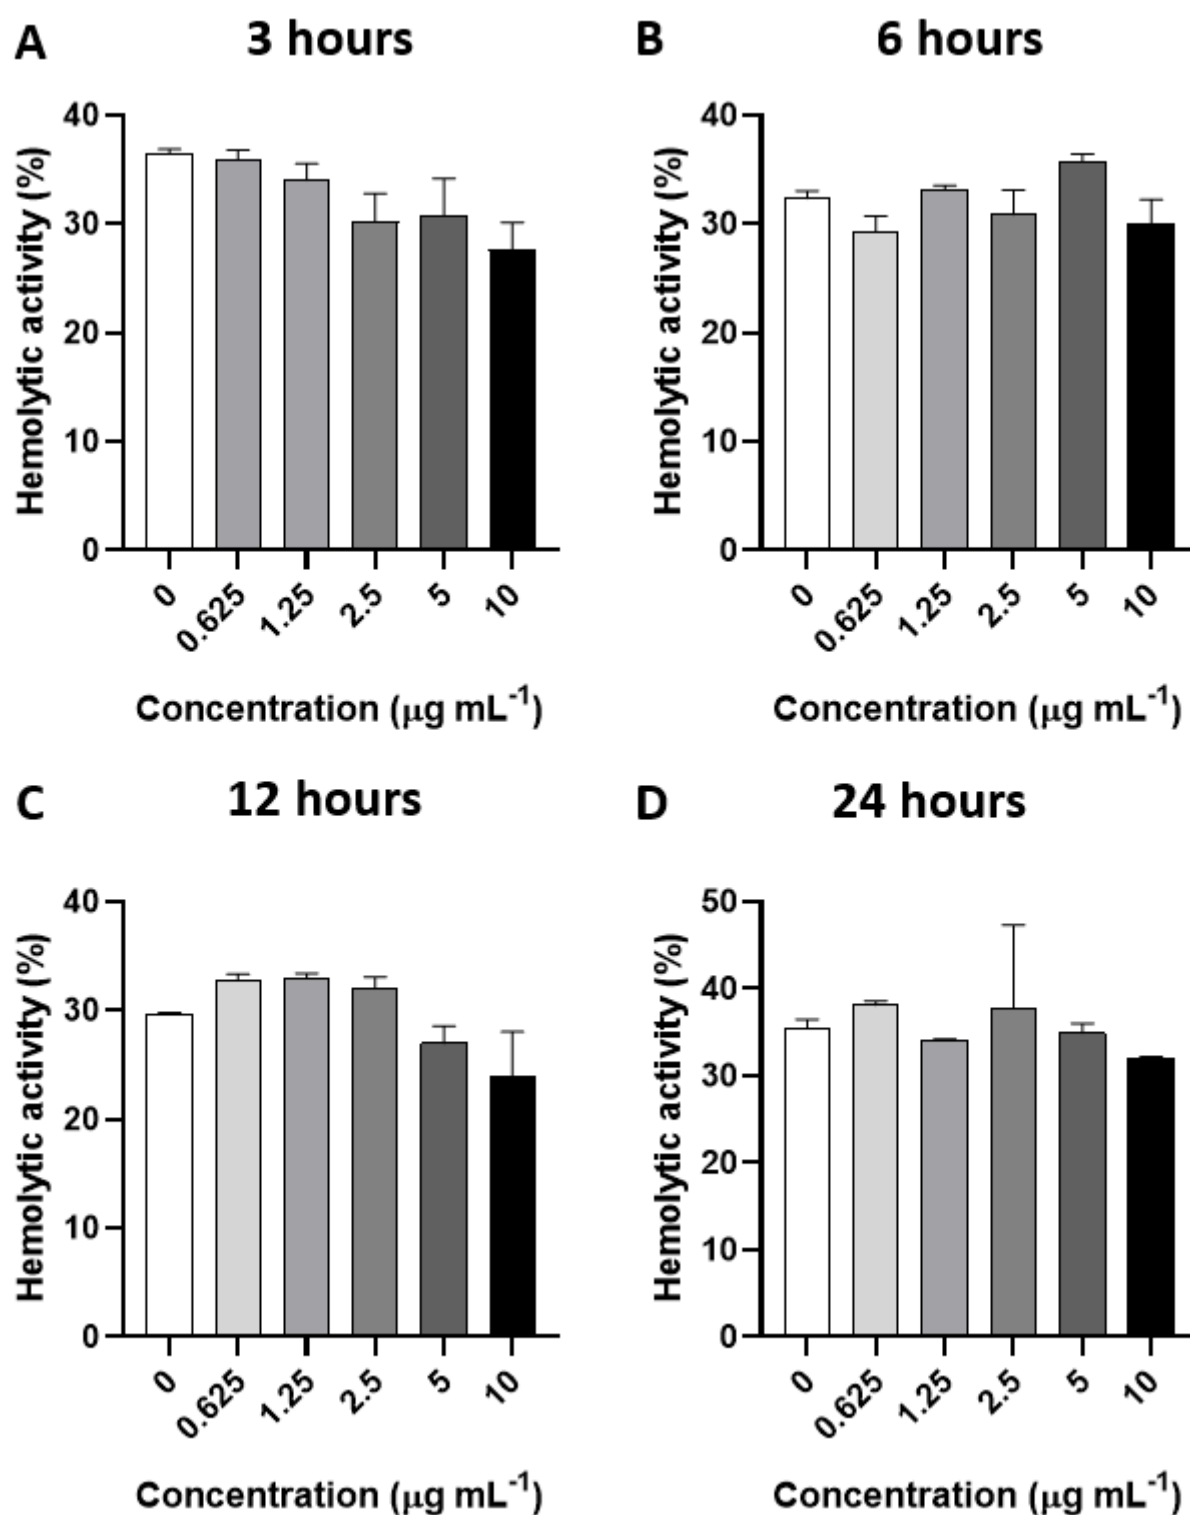

**Figure S2.** Hemolytic activity (expressed as percentage of oxyhemoglobin release) of gilthead seabream erythrocytes exposed to different concentrations of cantharidin (0, 0.625, 1.25, 2.5, 5, and 10  $\mu\text{g mL}^{-1}$ ) for (A) 3, (B) 6, (C) 12, and (D) 24 h. Data represent the mean  $\pm$  standard error of the mean (SEM) (n = 6). No significant differences between experimental groups were observed (ANOVA;  $p > 0.05$ ).
